# Supplementary material for: Enhancement of Brønsted acidity in zeolitic catalysts due to an intermolecular solvent effect in confined micropores
Source: Royal Society of Chemistry journal article supplement (doi:10.1039/c2cc32498a), 2012-01-01
Supplement: c2cc32498a.pdf [file c2cc32498a.pdf]

# Enhancement of Brønsted Acidity in Zeolitic Catalysts due to Intermolecular Solvent Effect in Confined Micropores<sup>†</sup>

Anmin Zheng,<sup>a</sup> Bing Han,<sup>a</sup> Bojie Li,<sup>a</sup> and Shang-Bin Liu<sup>b,c,\*</sup> Feng Deng<sup>a,\*</sup>

<sup>a</sup>State Key Laboratory of Magnetic Resonance and Atomic and Molecular Physics, Wuhan Center for Magnetic Resonance, Wuhan Institute of Physics and Mathematics, the Chinese Academy of Sciences, Wuhan 430071, China; E-mails: dengf@wipm.ac.cn.

<sup>b</sup>Institute of Atomic and Molecular Sciences, Academia Sinica, P. O. Box 23-166, Taipei 10617, Taiwan and <sup>c</sup>Department of Chemistry, National Taiwan Normal University, Taipei 11677, Taiwan; E-mail: sbliu@sinica.edu.tw.

## Supporting Informations:

### Experimental section

H-form Mordenite zeolite (Si/Al = 20) sample was obtained from Strem Chemical Inc. The integrity of its framework structure was confirmed by powdered XRD (Fig. S1). <sup>27</sup>Al MAS NMR (Fig.2S) indicated that only tetrahedral framework Al was present. Prior to the adsorption of TMPO probe molecule, the H-MOR zeolite was subjected to dehydration under vacuum (<10<sup>-3</sup> Pa). This is done by increasing the sample temperature at a rate of 1 K/min till reaching 673 K, then, maintained at the same temperature for at least 5 h before it was cooled back to room temperature (295 K). Detailed procedures invoked for introducing the TMPO molecule onto the zeolite sample can be found elsewhere.<sup>S1</sup> In brief, a known amount of TMPO adsorbate dissolved in anhydrous CH<sub>2</sub>Cl<sub>2</sub> was first added into a vessel containing the dehydrated H-MOR in a N<sub>2</sub> glovebox, followed by removal of the CH<sub>2</sub>Cl<sub>2</sub> solvent by evacuation at 323 K. To ensure a uniform adsorption of adsorbates in the pores/channels of the microporous adsorbent, the sealed sample vessel was further subjected to a baking treatment at 453 K for 8 h. Prior to the NMR measurements, the adsorbate-loaded sample sealed in the sample vessel was transferred into a NMR rotor with a Kel-F endcap in a glovebox under dry nitrogen atmosphere.

<sup>31</sup>P and <sup>27</sup>Al NMR experiments were carried out on a Varian Infinityplus-400 and 300 spectrometers operating at a Larmor resonance frequency of 161.98 and 78.11 MHz for <sup>31</sup>P and <sup>27</sup>Al, respectively. A single pulse sequence with a  $\pi/2$  pulse length of 4.4 and 2.25  $\mu$ s and a recycle delay of 1 and 10 s were used for acquiring the <sup>31</sup>P and <sup>27</sup>Al MAS NMR spectra at a sample-spinning frequency of 9 and 10 kHz, using 85% H<sub>3</sub>PO<sub>4</sub> and 1 M Al(NO<sub>3</sub>)<sub>3</sub> aqueous solution as the chemical shift reference, respectively.

### Computational method

During the structure optimization and subsequent calculations of <sup>31</sup>P NMR parameters, the electron correlation effects were modeled using the generalized gradient approximation (GGA) proposed by Perdew, Burke, and Ernzerhof (PBE method).<sup>S2</sup> For structure optimization, the couplings between the core and valence electrons were described by ultrasoft pseudopotentials. In addition, a plane-wave cut-off energy of 300 eV and a default medium level Monkhorst-Pack K point grid (1×1×3)<sup>S3</sup> in the Dmol package were adopted to sample the Brillouin zone. Calculation of all NMR parameters were performed by the GIPAW method<sup>S4-S6</sup> using a 1×1×2 Monkhorst-Pack K point grid and by expanding all wavefunctions in a plane-wave basis set at a definite cut-off energy of 550 eV. All ( $\delta^{31}\text{P}$ )<sub>cal</sub> were derived using the NMR module available in the CASTEP program package based on the optimized TMPO adsorbed structures in the H-MOR. Typically, to complete calculations of NMR parameters for each adsorption system, it requires a computation time of about 24 hours utilizing the parallel 128 cpu in an IBM-1350 cluster facilitated by the National Center for High-performance Computing (NCHC), Taiwan. The <sup>31</sup>P calculated

shielding tensors were further converted to  $(\delta^{31}\text{P})_{\text{cal}}$  values, which were referred to the absolute shielding of crystalline TMPO, namely 39 and 229 ppm for the experiment and theoretical value, respectively.<sup>S7</sup>

**References:**

- S1. Q. Zhao, W. H. Chen, S. J. Huang, Y. C. Wu, H. K. Lee, S. B. Liu, *J. Phys. Chem. B*, 2002, **106**, 4462.
- S2. J. P. Perdew, K. Burke, M. Ernzerhof, *Phys. Rev. Lett.*, 1996, **77**, 3865.
- S3. H. Monkhorst, J. D. Pack, *Phys. Rev. B*, 1976, **13**, 5188.
- S4. C. J. Pickard, F. Mauri, *Phys. Rev. B*, 2001, **63**, 245101.
- S5. P. Umari, X. Gonze, A. Pasquarello, *Phys. Rev. B*, 2004, **69**, 235102.
- S6. C. J. Pickard, F. Mauri, *Phys. Rev. Lett.*, 2003, **91**, 196401.
- S7. A. Zheng, S. J. Huang, S. B. Liu, F. Deng, *Phys. Chem. Chem. Phys.*, 2011, **13**, 14889.

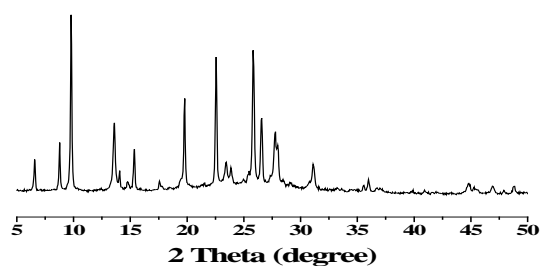

**Fig. S1.** Powdered XRD pattern of the H-Mordenite zeolite sample.

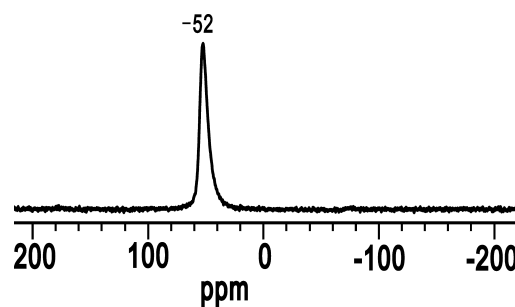

**Fig. S2.** <sup>27</sup>Al MAS NMR spectrum of the H-Mordenite zeolite sample.

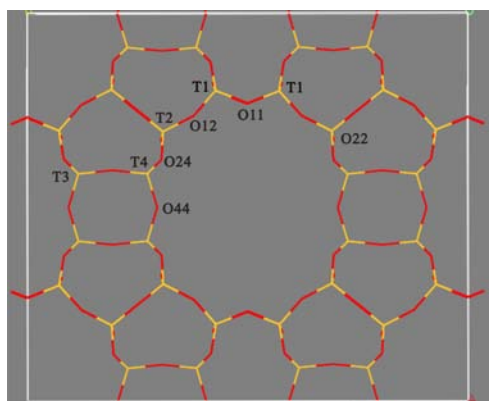

**Fig. S3.** Projection of the H-MOR topology indicating the four crystallographically inequivalent tetrahedral sites.
